# Supplementary material for: Manipulation of trions to enhance the excitonic emission in monolayer p-MoS2 and its hetero-bilayer by reverse charge injection
Source: Royal Society of Chemistry journal article supplement (doi:10.1039/d4nr04009k), 2024-11-25
Supplement: d4nr04009k1.pdf [file d4nr04009k1.pdf]

## Supplementary Information

### Manipulation of Trions to Enhance the Excitonic Emission in Monolayer p-MoS<sub>2</sub> and its Hetero-bilayer by Reverse Charge Injection

Rashed H. Lone<sup>1,2+\*</sup>, Shreya Gaonkar<sup>1+</sup>, B. Manoj Kumar<sup>1</sup>, and E. S. Kannan<sup>1</sup>,

<sup>1</sup>Department of Physics, BITS-Pilani K. K. Birla Goa Campus, Zuarinagar, Goa-403726, India.

<sup>2</sup>Functional Materials and Microsystems Research Group and the Micro Nano Research Facility, RMIT University, Melbourne, Victoria 3000, Australia

\*rashedlone55@gmail.com

+these authors contributed equally to this work

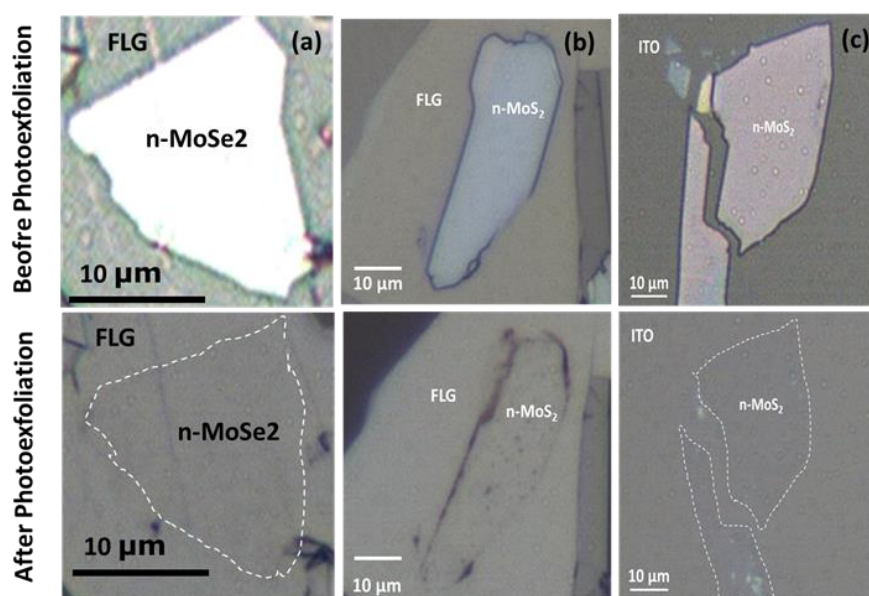

Figure S1. Optical images of n-MoSe<sub>2</sub> and n-MoS<sub>2</sub>, before and after photo-exfoliation on various substrates.

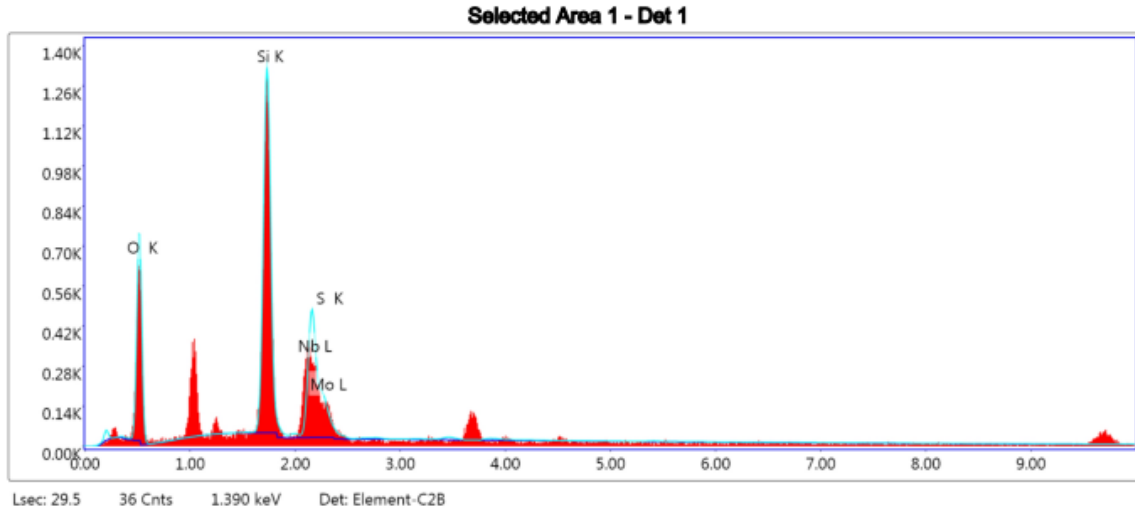

**eZAF Smart Quant Results**

| Element | Weight % | Atomic % | Net Int. | Error % | Kratio | Z      | A      | F      |
|---------|----------|----------|----------|---------|--------|--------|--------|--------|
| O K     | 45.4     | 69.6     | 149.2    | 10.8    | 0.1081 | 1.1111 | 0.2142 | 1.0000 |
| SiK     | 26.4     | 23.0     | 372.9    | 4.5     | 0.2072 | 1.0174 | 0.7686 | 1.0048 |
| NbL     | 26.7     | 7.0      | 135.1    | 5.7     | 0.1814 | 0.7880 | 0.8638 | 0.9995 |
| MoL     | 1.5      | 0.4      | 7.4      | 42.9    | 0.0100 | 0.7795 | 0.8472 | 0.9992 |
| S K     | 0.0      | 0.0      | 0.0      | 100.0   | 0.0000 | 0.9981 | 0.7233 | 1.0015 |

**Figure S2. Presence of Niobium in p-type MoS<sub>2</sub> is confirmed by Electron Dispersive Spectrum (EDS).**

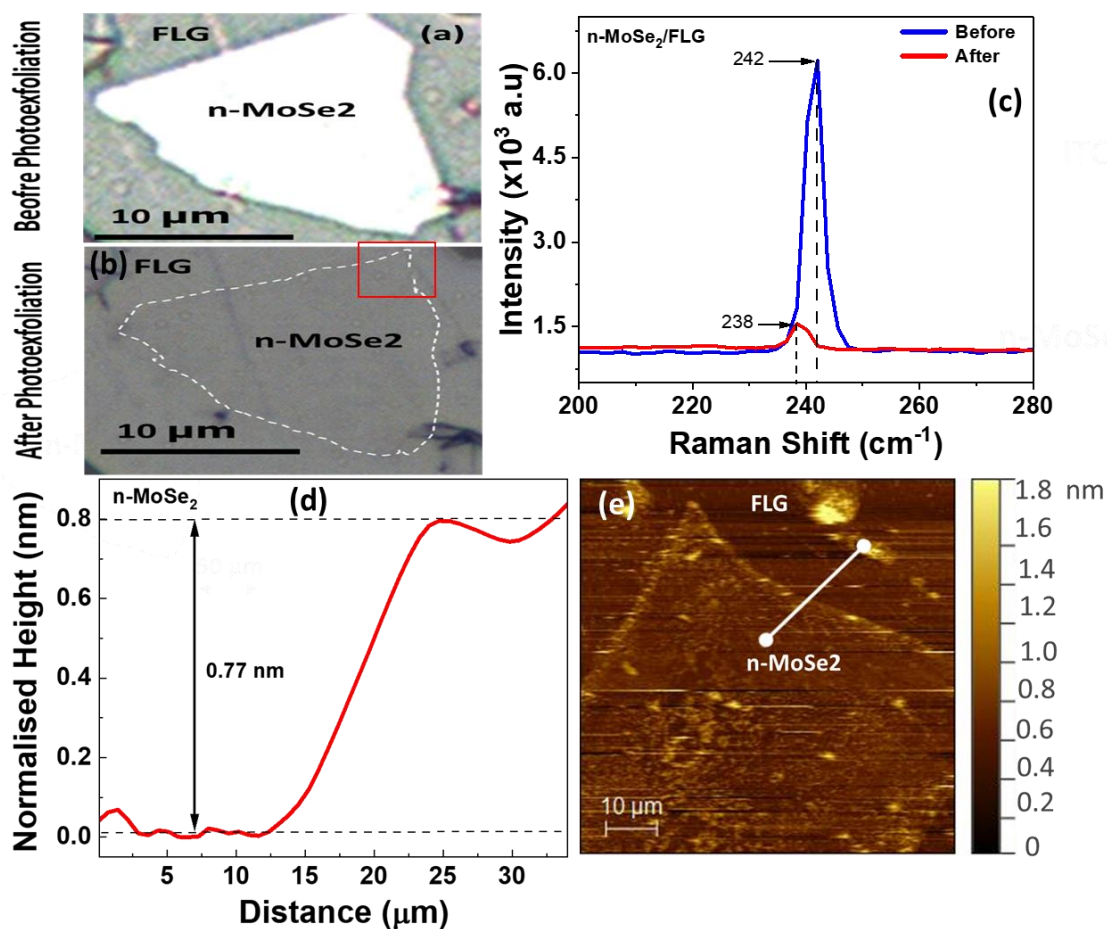

Figure S3. Optical image of n-MoSe<sub>2</sub> on FLG substrate (a) before and (b) after photoexfoliation. (c) Raman spectra of n-MoSe<sub>2</sub> on FLG, before (solid blue line) and after (solid red line) photo-exfoliation. (d) Height profile and (e) AFM image of monolayer n-MoSe<sub>2</sub>.

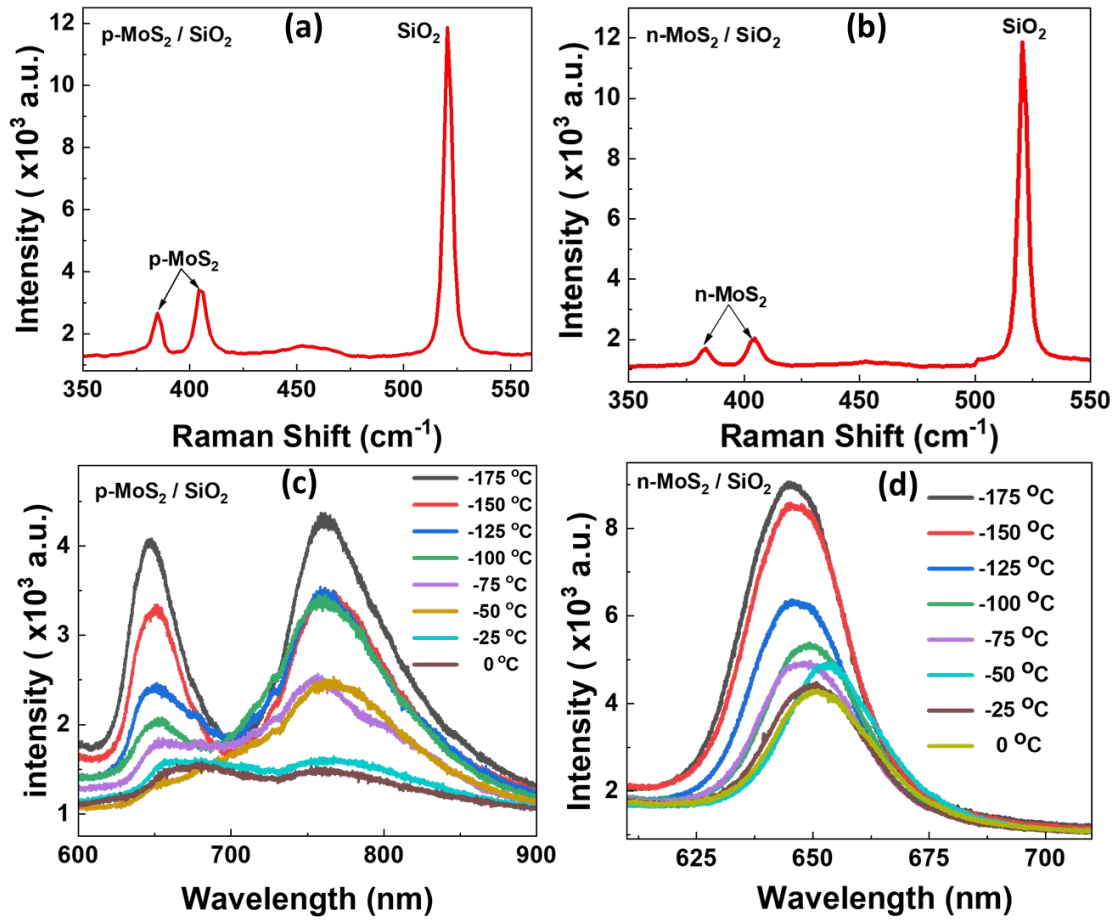

**Figure S4: Raman spectra on SiO<sub>2</sub>/Si substrate of (a) p-MoS<sub>2</sub> and (b) n-MoS<sub>2</sub>. Temperature dependent PL spectra on SiO<sub>2</sub>/Si substrate of (c) p-MoS<sub>2</sub> and (d) n-MoS<sub>2</sub>.**

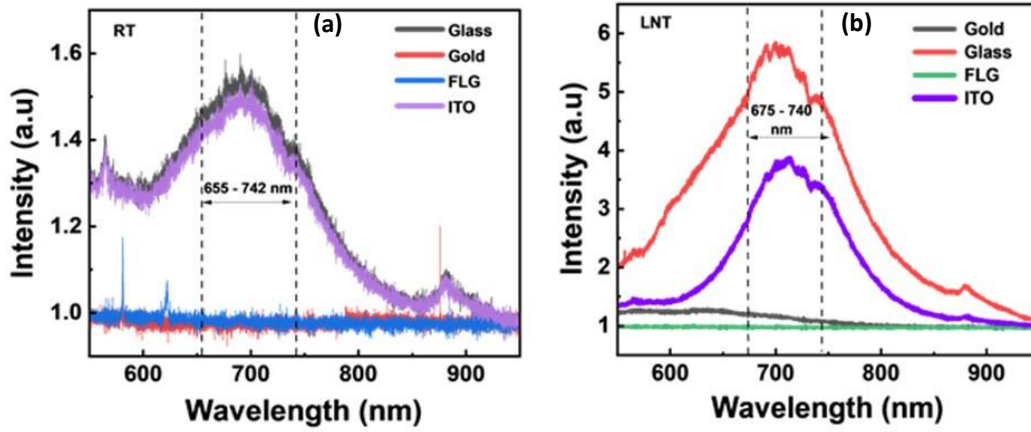

Figure S5. PL spectra of glass (solid black), gold (solid red), FLG (solid blue) and ITO (solid violet), depicting a same broad range of PL spectra in case of ITO and glass thus confirming that it originates from glass substrate at (a) RT and (b) LNT.

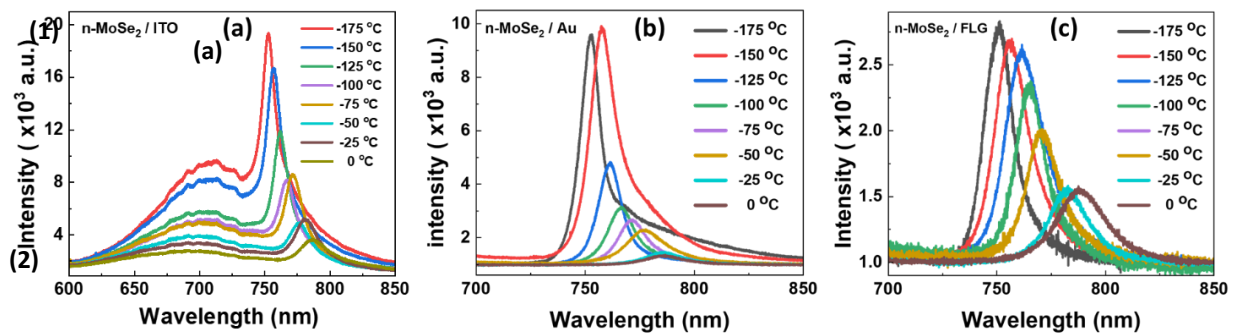

Figure S6: Temperature dependent PL spectra of n-MoSe<sub>2</sub> on (a) ITO, (b) Au and (c) FLG.
